# Supplementary material
Source: PubMed Central journal article supplement (PMC3721738)
Supplement: NIHMS451183-supplement-1_si_001.pdf [file NIHMS451183-supplement-1_si_001.pdf]

## Supplementary Figure S1

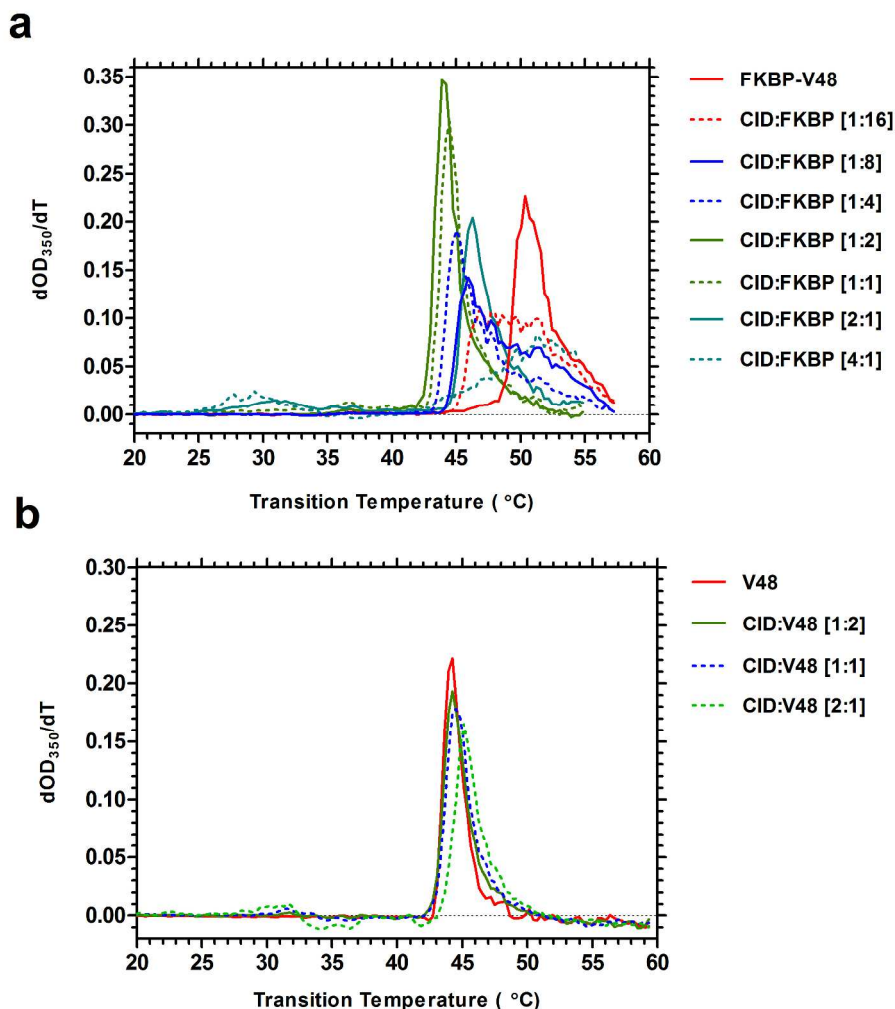

**Figure S1. Mixture with the CID ligand shifts the transition temperature of ELP V48 only when fused with FKBP domain.** The transition temperature was defined as the maximal first derivative of the optical density at 350 nm with respect to temperature. **(a)** The derivative  $dOD_{350}/dT$  is presented for the FKBP-V48 fusion protein (5  $\mu$ M) with varying ratios of the CID ligand. For FKBP-V48, the CID ligand produces a substantial downward shift up to a stoichiometry of CID: FKBP [1:2]. At higher ratios of CID, the major phase transition is shifted upwards again. **(b)** In contrast, phase separation of the ELP V48 alone (5  $\mu$ M) remains unshifted over varying ratios of the CID ligand.
